# Supplementary material
Source: PubMed Central journal article supplement (PMC7867592)
Supplement: NIHMS1647986-supplement-1.pdf [file NIHMS1647986-supplement-1.pdf]

**Table S1. Ranges of values for tertiles of each biomarker according to its distribution among control subjects,  
The Singapore Chinese Health Study and The Shanghai Cohort Study**

| Tertiles                | Singapore Cohort Study |                 |                  |                  | Shanghai Cohort Study |                 |                  |                  |
|-------------------------|------------------------|-----------------|------------------|------------------|-----------------------|-----------------|------------------|------------------|
|                         | IL-27<br>(ng/ml)       | IL-6<br>(pg/ml) | HMGB1<br>(ng/ml) | sRAGE<br>(pg/ml) | IL-27<br>(ng/ml)      | IL-6<br>(pg/ml) | HMGB1<br>(ng/ml) | sRAGE<br>(pg/ml) |
| 1 <sup>st</sup> tertile | 0.62-1.39              | 0.00-1.77       | 0.00-0.34        | 0.00-38.86       | 0.66-1.58             | 0.00-1.78       | 0.12-2.33        | 16.3-183.3       |
| 2 <sup>nd</sup> tertile | 1.39-1.96              | 1.77-2.65       | 0.34-1.21        | 38.86-189.3      | 1.58-2.16             | 1.78-3.15       | 2.33-4.08        | 183.3-338.8      |
| 3 <sup>rd</sup> tertile | 1.96-44.1              | 2.65-172.8      | 1.21-13.0        | 189.3-763.7      | 2.17-183.4            | 3.15-866.8      | 4.08-80.2        | 338.8-7216.5     |
