# Supplementary material
Source: PubMed Central journal article supplement (PMC7867592)
Supplement: NIHMS1647986-supplement-2.pdf [file NIHMS1647986-supplement-2.pdf]

**Table S2. Geometric means (95% confidence intervals) of serum IL-27 concentrations in hepatocellular carcinoma cases and control subjects stratified by selected demographic or risk factors, The Singapore Chinese Health Study**

| Selected factors                        | Cases |                                                       | Controls |                                                       | <i>p</i> <sup>a</sup> |
|-----------------------------------------|-------|-------------------------------------------------------|----------|-------------------------------------------------------|-----------------------|
|                                         | N     | IL-27 (ng/ml)<br>geometric mean (95% CI) <sup>a</sup> | N        | IL-27 (ng/ml)<br>geometric mean (95% CI) <sup>a</sup> |                       |
| All subjects                            | 100   | 2.37 (2.12-2.64)                                      | 100      | 1.77 (1.59-1.97)                                      | < <b>0.001</b>        |
| Sex                                     |       |                                                       |          |                                                       |                       |
| Men                                     | 75    | 2.16 (1.91-2.46)                                      | 75       | 1.69 (1.49-1.91)                                      | <b>0.008</b>          |
| Women                                   | 25    | 3.08 (2.49-3.81)                                      | 25       | 2.05 (1.64-2.56)                                      | <b>0.008</b>          |
| <i>P</i> <sup>a</sup>                   |       | <b>0.006</b>                                          |          | 0.136                                                 |                       |
| By body mass index (kg/m <sup>2</sup> ) |       |                                                       |          |                                                       |                       |
| <18.5                                   | 3     | 2.51 (1.40-4.53)                                      | 3        | 7.43 (4.22-13.23) <sup>b</sup>                        | <b>0.010</b>          |
| 18.5 - <23.0                            | 43    | 2.19 (1.86-2.59)                                      | 43       | 1.81 (1.55-2.11)                                      | 0.111                 |
| 23.0 - <27.5                            | 38    | 2.41 (2.05-2.98)                                      | 40       | 1.72 (1.47-2.02)                                      | <b>0.004</b>          |
| ≥27.5                                   | 18    | 2.62 (2.07-3.30)                                      | 14       | 1.36 (1.04-1.78)                                      | < <b>0.001</b>        |
| <i>P</i> for trend <sup>a</sup>         |       | 0.553                                                 |          | <b>0.002</b>                                          |                       |
| By smoking status                       |       |                                                       |          |                                                       |                       |
| Never smokers                           | 44    | 2.46 (2.09-2.90)                                      | 49       | 1.63 (1.39-1.91)                                      | < <b>0.001</b>        |
| Former smokers                          | 33    | 2.41 (1.99-2.92)                                      | 34       | 1.85 (1.54-2.24)                                      | 0.053                 |
| Current smokers                         | 23    | 2.15 (1.72-2.69)                                      | 17       | 2.01 (1.56-2.60)                                      | 0.700                 |
| <i>P</i> for trend <sup>a</sup>         |       | 0.327                                                 |          | 0.150                                                 |                       |
| By alcohol consumption                  |       |                                                       |          |                                                       |                       |
| Nondrinkers                             | 75    | 2.49 (2.20-2.81)                                      | 79       | 1.82 (1.62-2.06)                                      | < <b>0.001</b>        |
| Moderate drinkers                       | 22    | 1.93 (1.53-2.43)                                      | 21       | 1.61 (1.27-2.05)                                      | 0.295                 |
| Heavy drinkers                          | 3     | 2.49 (1.34-4.62)                                      | 0        | -                                                     |                       |
| <i>P</i> for trend <sup>a</sup>         |       | 0.667                                                 |          | 0.224                                                 |                       |
| By HBsAg status                         |       |                                                       |          |                                                       |                       |
| Negative                                | 59    | 2.50 (2.18-2.87)                                      | 91       | 1.69 (1.51-1.88)                                      | < <b>0.001</b>        |
| Positive                                | 41    | 2.14 (1.88-2.60)                                      | 9        | 2.71 (1.92-3.82)                                      | 0.292                 |
| <i>P</i> <sup>a</sup>                   |       | 0.269                                                 |          | <b>0.010</b>                                          |                       |

<sup>a</sup> Geometric means and *P* values were derived from analysis of covariance with the following covariates: age, sex, body mass index (<18.5, 18-<23, 23-<27.5, ≥27.5 kg/m<sup>2</sup>), alcohol consumption (nondrinkers, moderate drinkers, and heavy drinkers), cigarette smoking (never, former, current smokers), and serological status of hepatitis B surface antigen (negative, positive).

<sup>b</sup> One control subject with extremely high IL-27 concentration (44.1 ng/ml) was HBsAg-positive and had a history of asthma.
