# Supplementary material
Source: PubMed Central journal article supplement (PMC7867592)
Supplement: NIHMS1647986-supplement-3.pdf [file NIHMS1647986-supplement-3.pdf]

**Table S3. Geometric means (95% confidence intervals) of serum IL-27 concentrations in hepatocellular carcinoma cases and control subjects stratified by selected demographic or risk factors, The Shanghai Cohort Study**

| Selected factors                        | Cases |                                                          | Controls |                                                       | <i>P</i> <sup>a</sup> |
|-----------------------------------------|-------|----------------------------------------------------------|----------|-------------------------------------------------------|-----------------------|
|                                         | N     | IL-27 (ng/ml)<br>geometric mean (95%<br>CI) <sup>a</sup> | N        | IL-27 (ng/ml)<br>geometric mean (95% CI) <sup>a</sup> |                       |
| All subjects                            | 100   | 2.61 (2.34-2.90)                                         | 100      | 1.94 (1.74-2.16)                                      | <b>&lt;0.001</b>      |
| By body mass index (kg/m <sup>2</sup> ) |       |                                                          |          |                                                       |                       |
| <18.5                                   | 10    | 3.37 (2.44-4.64)                                         | 8        | 2.31 (1.61-3.32)                                      | 0.133                 |
| 18.5 - <23.0                            | 51    | 2.56 (2.21-2.96)                                         | 59       | 1.92 (1.67-2.19)                                      | <b>0.006</b>          |
| 23.0 - <27.5                            | 30    | 2.47 (2.05-2.98)                                         | 29       | 2.00 (1.65-2.43)                                      | 0.142                 |
| ≥27.5                                   | 9     | 2.41 (1.72-3.39)                                         | 4        | 1.47 (0.88-2.43)                                      | 0.111                 |
| <i>P</i> for trend <sup>a</sup>         |       | 0.345                                                    |          | 0.080                                                 |                       |
| By smoking status                       |       |                                                          |          |                                                       |                       |
| Never smokers                           | 39    | 2.52 (2.13-2.97)                                         | 46       | 2.10 (1.81-2.45)                                      | 0.126                 |
| Former smokers                          | 9     | 3.90 (2.80-5.43)                                         | 7        | 1.94 (1.32-2.84)                                      | <b>0.008</b>          |
| Current smokers                         | 52    | 2.46 (2.13-2.83)                                         | 47       | 1.82 (1.56-2.11)                                      | <b>0.006</b>          |
| <i>P</i> for trend <sup>a</sup>         |       | 0.638                                                    |          | 0.081                                                 |                       |
| By alcohol consumption                  |       |                                                          |          |                                                       |                       |
| Nondrinkers                             | 62    | 2.52 (2.20-2.89)                                         | 63       | 2.06 (1.80-2.35)                                      | <b>0.046</b>          |
| Moderate drinkers                       | 26    | 2.68 (2.20-3.26)                                         | 22       | 1.83 (1.47-2.28)                                      | <b>0.013</b>          |
| Heavy drinkers                          | 12    | 2.88 (2.14-3.87)                                         | 15       | 1.66 (1.28-2.16)                                      | <b>0.007</b>          |
| <i>P</i> for trend <sup>a</sup>         |       | 0.490                                                    |          | <b>0.035</b>                                          |                       |
| By HBsAg status                         |       |                                                          |          |                                                       |                       |
| Negative                                | 47    | 2.19 (1.89-2.53)                                         | 89       | 1.75 (1.58-1.95)                                      | <b>0.018</b>          |
| Positive                                | 53    | 3.55 (3.09-4.08)                                         | 11       | 2.05 (1.52-2.77)                                      | <b>0.001</b>          |
| <i>P</i> <sup>a</sup>                   |       | <b>&lt;0.001</b>                                         |          | 0.339                                                 |                       |

<sup>a</sup> Geometric means and *P* values were derived from analysis of covariance with the following covariates: age, sex, body mass index (<18.5, 18-<23, 23-<27.5, ≥27.5 kg/m<sup>2</sup>), alcohol consumption (nondrinkers, moderate drinkers, and heavy drinkers), cigarette smoking (never, former, current smokers), and serological status of hepatitis B surface antigen (negative, positive)
