# Supplementary material
Source: PubMed Central journal article supplement (PMC7867592)

**Figure S1. Median values of interleukin-27 (IL-27) mRNA in tumor tissues of individual cancer types with more than 100 cases in The Cancer Genome Atlas (TCGA) project.** The transcriptomic expression of IL-27 gene was 11.8- to 117-fold higher in the tumor tissue of hepatocellular carcinoma than in tissues of any other cancer type. Number in parenthesis denotes the number of cases included in this analysis.

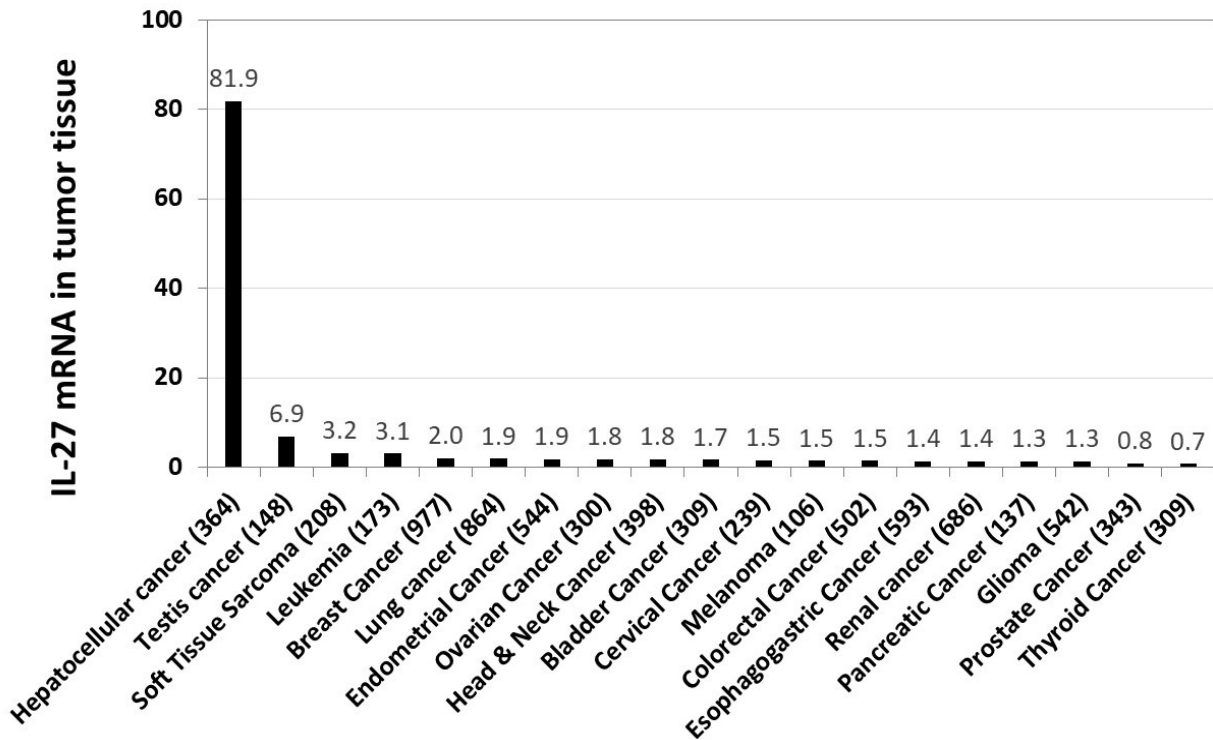

Supplement: NIHMS1647986-supplement-4.pdf [file NIHMS1647986-supplement-4.pdf]
